# Supplementary material for: A Preliminary In Vitro Study of 3D Full-Field Strain Distribution in Human Whole Premolars Using Digital Image Correlation
Source: MDPI journal article supplement (doi:10.3390/ma15062246), 2022-03-18
Supplement: s1 [file s1]

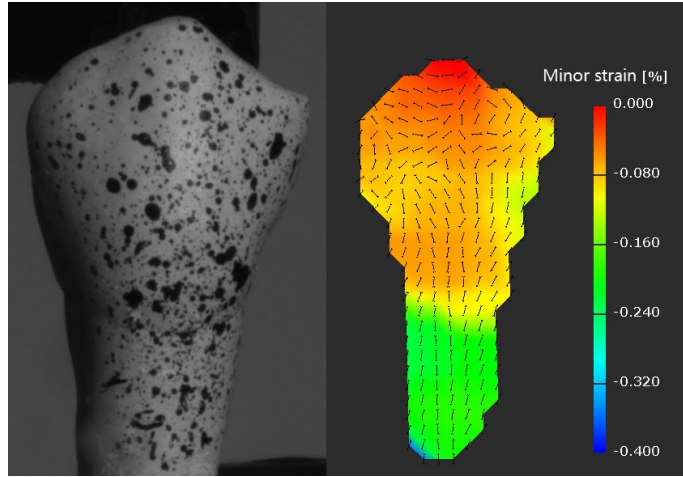

Figure S1 The orientation distributions of the minor strains of (a) specimen 3 at (b) stage 30.

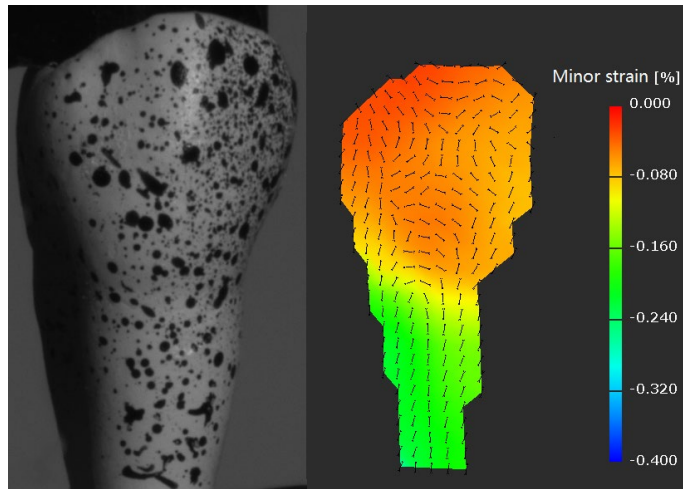

Figure S2 The orientation distributions of the minor strains of (a) specimen 4 at (b) stage 30.

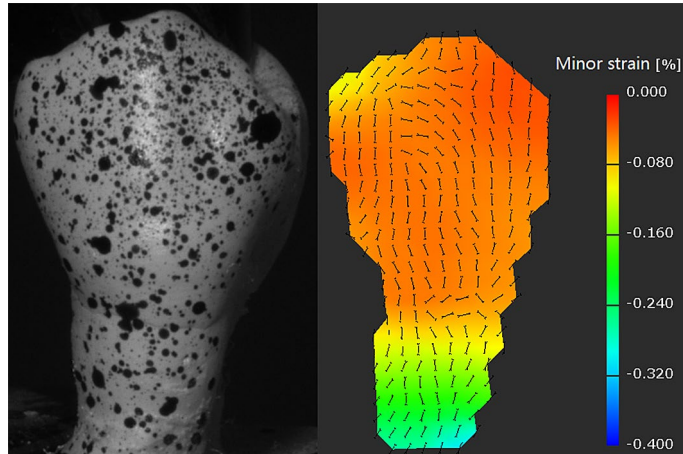

Figure S3 The orientation distributions of the minor strains of (a) specimen 5 at (b) stage 30.

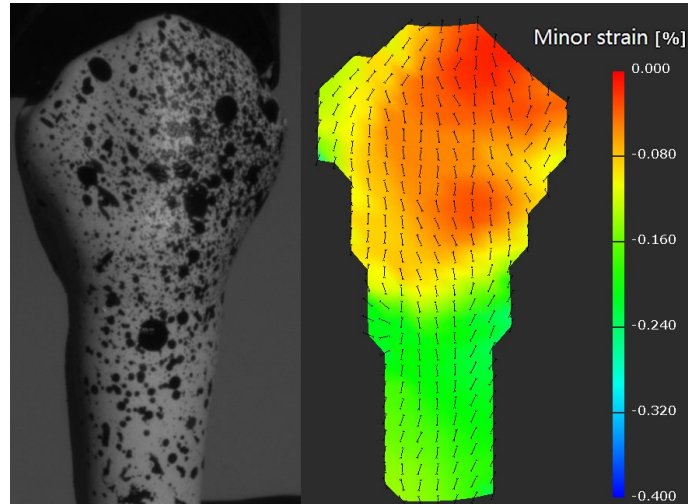

Figure S4 The orientation distributions of the minor strains of (a) specimen 6 at (b) stage 30.

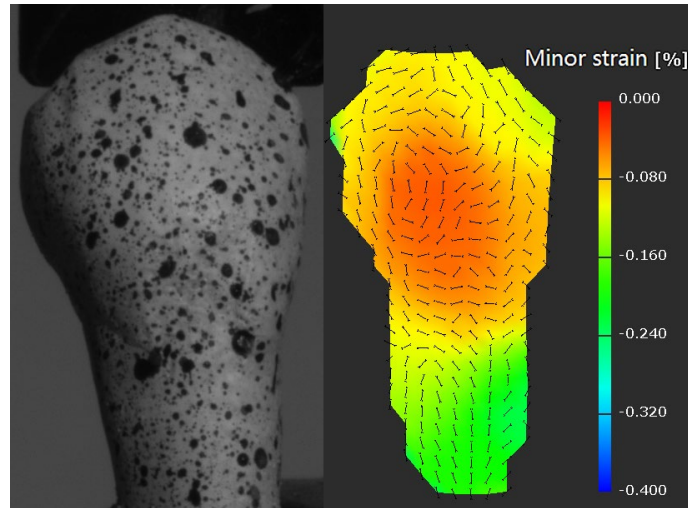

Figure S5 The orientation distributions of the minor strains of (a) specimen 7 at (b) stage 30.

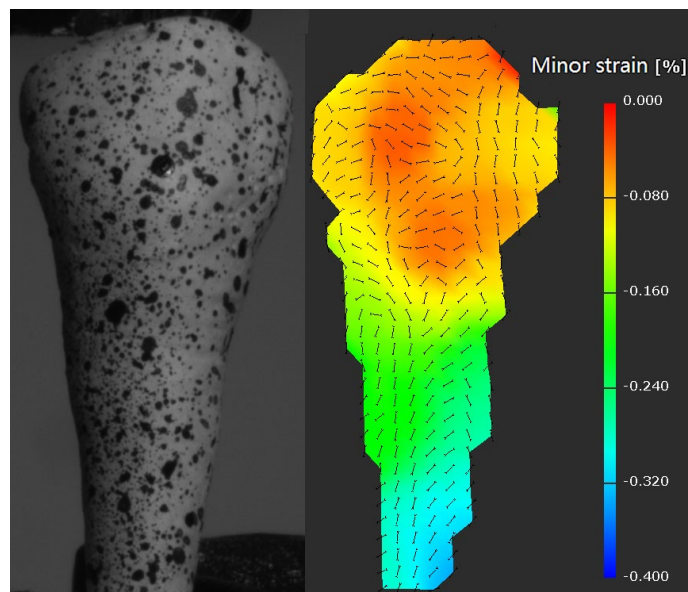

Figure S6 The orientation distributions of the minor strains of (a) specimen 8 at (b) stage 30.

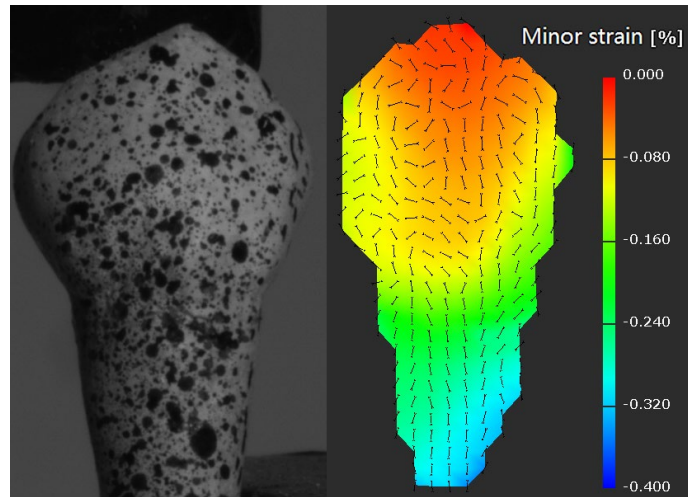

Figure S7 The orientation distributions of the minor strains of (a) specimen 9 at (b) stage 30.

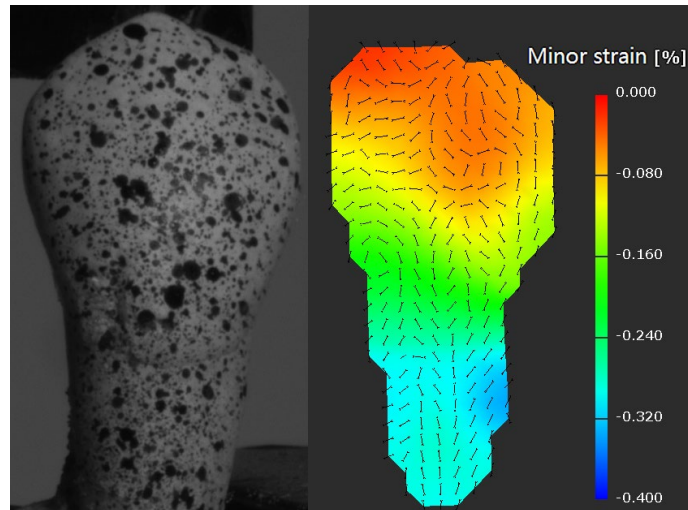

Figure S8 The orientation distributions of the minor strains of (a) specimen 10 at (b) stage 30.
